# Supplementary material
Source: Research Square preprint supplement (doi:10.21203/rs.3.rs-7236057/v1)
Supplement: Supplementary file 2 [file c6ef56f7820322567ea92fa7.docx]

Protocol: A randomised double-blind placebo-controlled pilot study of probiotic use and gut microbial analyses in Parkinson’s Disease.

1Barker, L. A., 2Jordon, C., 3 Wilcockson, H., 4 Sanders, D., 5 Corfe, B., 6 Dalton, C., 7Carter, A. & 7 Kudiersky, N.

1. Associate Professor in Cognitive Neuroscience, Institute of Social Science and Advanced Wellbeing Research Centre, Sheffield Hallam University, Sheffield S10 2BQ.

2. Senior Lecturer in health psychology, School of Psychology, University of Derby, UK.

3. Research Fellow, Centre of Behavioural Science and Applied Psychology, Institute of Social Science, Sheffield Hallam University, Collegiate Crescent Campus, Sheffield, UK.

4.Consultant & Professor of Gastroenterology, The Academic Unit of Gastroenterology, Royal Hallamshire Hospital, Sheffield UK.

5.Professor of Oncology, Centre for Healthier Lives, Newcastle University, Newcastle upon Tyne, NE1 7RU.

6.Associate Professor in Neuroscience and Genetics School of Biosciences and Chemistry, Biomolecular Sciences Research Centre, Sheffield Hallam University, Sheffield, UK.

7. Research Fellow, School of Sport and Physical Activity Research Centre, Advanced Wellbeing Research Centre, Olympic legacy Park, Sheffield S9 3TY.

Project approvals:

Sheffield Teaching Hospitals Project Reference Number: STH 20890

Randomised Clinical trials. Gov: NCT 04140760

IRAS Number/MHRA/HRA: 262286

| Table of Contents | Page |
| --- | --- |
| Project Details |  |
| Sponsor Details | 3 |
| Short Project Title | 3 |
| Research Aims | 3 |
| Abstract | 3 |
| Scientific Background | 4 |
| Project Plan | 7 |
| Collecting fecal samples | 7 |
| Analysing microbiome DNA from stool samples in PwP | 8 |
| Patient experience and patient feedback | 8 |
| Patient attrition and adherence | 8 |
| Patient Identification Centre (PIC) | 8 |
| Patient cognitive-behavioural/mood state/QoL testing | 9 |
| Study design | 9 |
| Inclusion and Exclusion Criteria: | 9 |
| Materials and Measures | 10 |
| Probiotic/Placebo | 10 |
| Stool sample collection: | 10 |
| Microbiome measurement: 16S rRNA gene sequencing and compositional analysis: | 11 |
| References for sequencing protocol: | 12 |
| Behavioural and Mood Measures: | 12 |
| Unified Parkinson’s Disease Rating Scale (UPDRS - Fahn et al,1987) | 13 |
| Quality of life (Jenkinson et al., 1997) | 13 |
| Mood state: Depression: Beck Depression Inventory-II (BDI-II) Beck, Steer & Brown, 1996) | 13 |
| Gastrointestinal Symptom Rating Scale (GSRS - Svedlund, Sjodin & Dotevall 1988) | 13 |
| Cognitive Measure: FAS Cognitive Initiation Task (Benton & Hamsher 1976) | 14 |
| Sleep: The Parkinson’s disease Sleep Scale (Chaudhuri, Pal, DiMarco, Whately-Smith et al., 2002) | 14 |
| Milestones | 14 |
| Blinding | 15 |
| Expertise of Chief Investigator and team | 15 |
| Ethical considerations | 16 |
| Funding | 19 |
| Evidence of Equipoise | 19 |
| Service user involvement: | 19 |
| References | 20 |
| Appendices | 23 |

Sponsor Details**:**

Sheffield Hallam University.

Contact on behalf of the Sponsor:

Dr Keith Fildes

Sheffield Hallam University Research and Innovation Office,

Room 4, Unit 1, Science Park,

Sheffield.

S1 2WB

Email: [researchsupport@shu.ac.uk](mailto:researchsupport@shu.ac.uk)

Protocol Version Number 3

Date: 3 - 21st/June/2019

Short: Pilot study of probiotic use in Parkinson's Disease and microbiome analyses at baseline and 12-weeks (Note: PwP will be used throughout for People with Parkinson’s)

Research Aims:

To evaluate the components and processes needed for a full-scale clinical study: recruitment, randomisation, attrition, probiotic use, stool sample collection, microbiome sequencing and behavioural/cognitive measures to inform a full-scale study in line with NIHR pilot study guidance.

To analyse microbiome data at species level and establish whether there is bacterial signature associated with Parkinson’s (and whether that is changed by probiotic intervention) to inform the specific focus of a larger trial.

Abstract:

The proposed research is an exploratory pilot study that will recruit 70 participants, 35 in the probiotic and 35 in the placebo arm of the study. The pilot study will investigate the process of conducting randomized, double-blind, placebo-controlled research of probiotic use in PwP. The primary aim is to test elements of the study design for a full-scale clinical study: recruitment, randomisation, probiotic use, stool sample collection and DNA sequencing and behavioural/cognitive measures. The secondary aim is to establish the microbiome data at species level at baseline and after 12-weeks to determine whether there is any identifiable pattern associated with the condition and whether this changes because of probiotic intervention, or over time in the placebo group.

Parkinson’s Disease (PD) is a neurodegenerative condition that affects motor functions and a range of non-motor abilities. There is no cure and a definitive cause is not yet known. It has a prevalence of 0.3% in the general population and 1–3% in the population over the age of 65. Globally, it is the second most common neurodegenerative disorder and due to the lack of early diagnosis and effective therapy, represents a large burden for society and healthcare provision. The underlying pathology of PD is associated with accumulation of abnormal clumps of alpha-synuclein protein termed Lewy bodies and Lewy neurites in the central nervous system (CNS) that impede the normal function of brain cells. Evidence from animal studies indicates that the production of alpha-synuclein begins in the gut, and gastro-intestinal problems are a common feature of PD.

The gut contains millions of micro-organisms termed the microbiome. Over the past decade research findings have identified a complex bidirectional interaction between the gastrointestinal (GI) tract and the central nervous system (CNS), the Gut-Brain axis. It is now known that the Gut-Brain axis is adversely affected by PD. Recently, probiotics have been proposed as a potential intervention for systemic and neurological conditions by improving microbiome composition in PwP.

Data obtained from this pilot study will be used to identify challenges in conducting research using probiotics in patients with Parkinson’s Disease and provide a rationale for conducting a full-scale study including information that may reduce or eliminate problems that limit the successful delivery of a full-scale trial. Microbiome data will be analyzed pre- and post-study to distinguish baseline microbiome at species level across all participants and whether there is alteration in the probiotic compared to the placebo group at follow up.

Scientific Background:

Parkinson’s Disease (PD) is a neurodegenerative condition that primarily affects motor function but also comprises a range of non-motor deficits. There is no cure and a definitive cause has not been established. This may be because disease progression affects multiple brain systems including but not limited to, dopaminergic, noradrenergic, serotoninergic, and cholinergic systems (Berg et al., 2014). It has a prevalence of 0.3% in the general population and 1–3% in the population over the age of 65 (Nussbaum & Ellis, 2003).

Pathological identifiers of PD are Lewy bodies and Lewy neurites which are mainly composed of aggregated and phosphorylated protein known as alpha-synuclein (Gibb & Lees, 1988). PD is the second most common neurodegenerative disorder and due to the lack of early diagnosis and effective therapy, represents a large burden for the patient, the patient’s family, healthcare provision and society more generally.

The classic motor symptoms include bradykinesia (slowed movement), resting tremor, rigidity, movement initiation problems and postural instability caused by the death of dopamine-generating cells in the substantia nigra. Non-motor symptoms include loss of smell and problems with gastrointestinal (GI), cardiovascular and urogenital systems. Motor problems of PD are sensitive to dopaminergic medication but there are also a range of dopa-unresponsive symptoms (Chaudhuri, Healy & Schapira, 2006). These functions worsen with age and disease progression and include dysautonomia (disorder of autonomic nervous system function) – cognitive decline, postural instability (Aarsland et al., 2004) and chronic intractable constipation that is common among PwP (Kaye et al., 2006).

Over the past decade research findings have identified a complex bidirectional interaction between the gastrointestinal (GI) tract and the central nervous system the *Gut-Brain axis* (Braak et al., 2006). It is now known that different levels of the Gut-Brain axis including the autonomic nervous system, and the enteric nervous system are affected by PD. Inside the human gut are approximately 100 trillion micro-organisms (including bacteria, viruses, fungi, archaea and protozoa) that together constitute the gut microbiome (GM - Bull & Plummer, 2014). The human genome consists of about 23000 genes, whereas the microbiome encodes over three million genes producing thousands of metabolites, which replace many of the functions of the host, consequently influencing the host’s fitness, phenotype, and health in a symbiotic relationship. Recently, research findings indicate that gut-brain interactions are influenced by the gut microbiota (Borre et al.,2014), and the microbiome is now considered to be an actual bodily organ serving important functions for the host (Valdes et al., 2018).

Gut microbiota might influence brain function by synthesizing or mimicking a range of host-signalling neuroactive molecules, such as acetylcholine, catecholamine, gamma-aminobutyric acid, histamine, melatonin and 5-hydroxytryptamine (5-HT - Serotonin). Serotonin regulates peristalsis (the passage of food through the gut) and mood state (serotonin is depleted in those with depression). Indeed, all of these neurotransmitters play a vital role in brain health and cognitive and motor function. Changes in gut microbiota composition may also alter gut barrier function and intestinal permeability, affecting gastrointestinal epithelial cells, the immune system, the enteric system and neurons and glial cells (Valdes et al., 2018).

It is also possible that changes to gut microbiota trigger intestinal inflammation that initiates alpha-synuclein misfolding; the purported pathological mechanism in PD. We now know that gastrointestinal dysfunction is present in over 80% of PD patients (Pfeiffer, 2003). Indeed, James Parkinson (Hurwitz, 2014) identified gut problems as a *diagnostic* symptom of PD in his original classification of the *shaking palsy*. Some researchers have proposed that non-motor symptoms, including gastrointestinal dysfunction, precede the onset of typical PD motor symptoms by several years (Qualman et al., 1984), and there is emerging evidence that alpha-synuclein clumping begins in the gut before spreading to the brain (Perez-Pardoa et al., 2017 see Appendix I). However, there currently there is a paucity of data to help ascertain with any certainty whether changes to microbiome population provides the anatomical basis of GI symptoms in PD or are a precursor to neurological symptoms (Lebouvier et al., 2010).

Lebouvier et al., (2010) performed colonic biopsies on a series of PD patients and found that 72% had Lewy neurites, whereas there were none in the control group. They also found a higher degree of constipation in the PD group compared to controls and a strong correlation between Lewy neurite burden and disease progression. Symptoms such as dysphagia, nausea, gastroparesis, and bowel dysfunction, including both reduced bowel movement frequency and dyschesia (difficult or painful defecation) are significant causes of disability in PwP (Pfeiffer et al., 2003). Any reduction in these symptoms would enhance quality of life for PwP.

Recently, probiotics have been proposed as a potential intervention for systemic and neurological conditions (Perez-Pardoa et al., 2017). From 2002-2012 there have been 1041 clinical trials on Pubmed investigating effects of probiotics. Importantly, the micro-organisms must arrive alive, survive and thrive to colonize the GI tract (Fredua-Agyeman & Gaisford, 2014). In the present study we aim to test the feasibility of using a probiotic with PD patients in a randomized placebo-controlled pilot study.

There are several probiotics on the market; Symprove™ is a commercial probiotic company that has a robust track record of involvement in research. Symprove™ also produce a placebo that has been used in all other clinical trials using the probiotic. Symprove™ provide both probiotic and placebo for free for all research studies using their product; a standardized procedure is followed for research studies that they engage with which does not give them any IP, ownership of data or findings (see Appendix II for Symprove factsheet). We plan to use Symprove™ in the current pilot study but make no claim about the products efficacy. We may use a different product, or combinations of products and dietary adaptations in the full-scale clinical trial proper depending upon the results of the current study regarding compliance and ease of use.

Several published studies have already been conducted with Symprove™. Sisson, Ayis and Sherwood (2014) evaluated the Symprove multi-strain liquid probiotic in a randomized double-blind placebo controlled 12-week trial with irritable bowel syndrome patients (IBS). Findings showed a significant improvement in overall symptom severity in IBS patients and the product was well-tolerated. Other research investigated the comparative health and survival of probiotic species in several commercially available formulations (Fredua-Agyeman & Gaisford, 2014). Findings indicated that liquid-based products delivered a viable organism dose equivalent to product claims and freeze-dried products fared the worse. Microbial growth was fastest with Symprove™ and a product called VSL#3.

Other research investigated the control of growth of pathogenic gut bacteria using probiotics. *C difficile* is an antibiotic-resistant opportunistic microbe that proliferates in the gut after antibiotic use causing inflammation and diarrhea. Findings showed that Symprove™ had an inhibitory effect against C difficile, possibly due to a change in the PH milieu with the introduction of different strains of beneficial bacteria. Another study found that a 12-week intervention with Symprove™ significantly improved the frequency of four symptoms associated with chronic, non-acute symptomatic diverticular disease but did not improve abdominal pain scores (Kvasnovsky, 2017). Additionally, other results show that Symprove™ has antipathogenic activity against E. coli, S. sonnei and *MRSA* (Dodoo, 2018).

We have completed a comprehensive review of the relevant literature including *completed, ongoing* and *currently* *recruiting* studies using Web of Science and ClinicalTrials.GOV with selected search terms to identify microbiome studies, use of probiotics in PD patients, relationship between gut microbiome and neurological disorders. This is a relatively new area of research and very few studies were identified that had used probiotics in PD in a controlled trial, beyond a few case studies or small samples (n = 3).

We propose an exploratory pilot study to examine the process of conducting randomised, double-blind, placebo-controlled research about probiotic use in 70 Parkinson's Disease patients (35 in each arm). The primary aim of the study is to test elements of the study design for a full-scale clinical study: recruitment, randomisation, probiotic use, stool sample collection and DNA sequencing and behavioural/cognitive measures. The secondary aim is initial analyses of microbiome species taxa in both groups pre- and post-intervention.

Project Plan


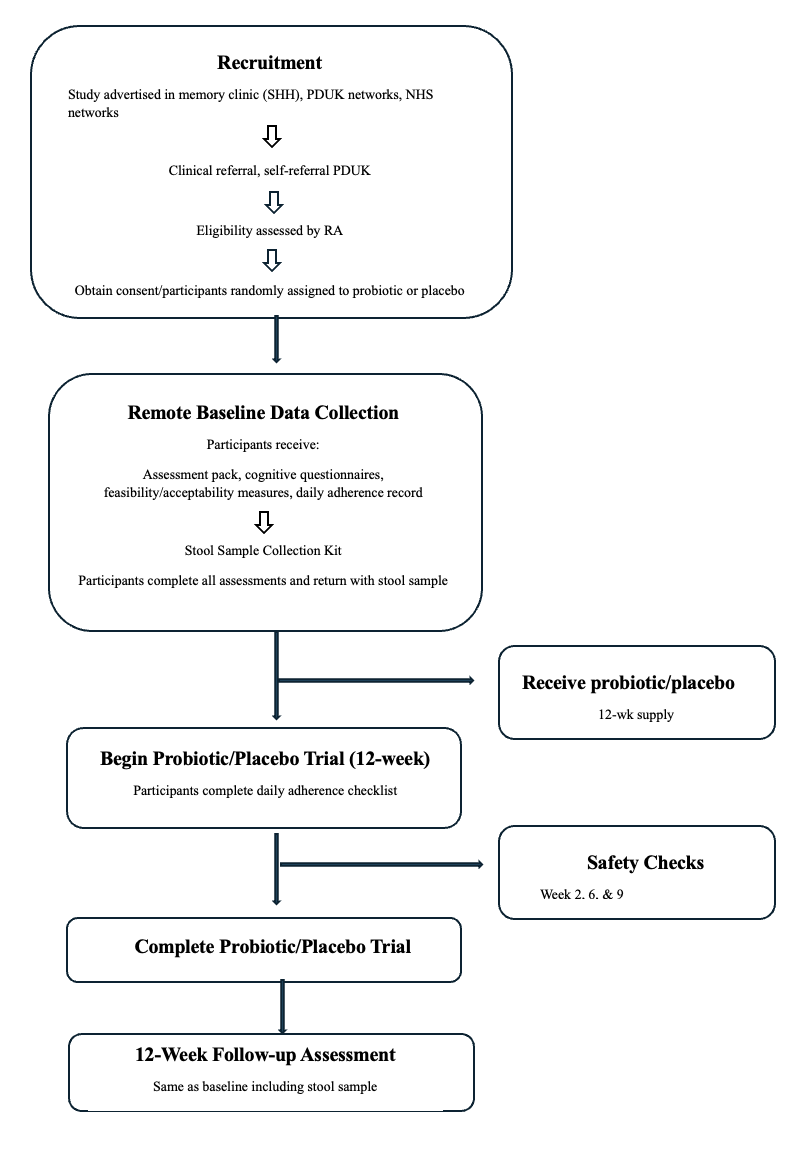


Participants will take the liquid probiotic or placebo daily following manufacturers guidelines, in the same way as if they bought the product over the counter (for a period of 12 weeks). We will not make any changes or alterations to the product as it currently stands nor the recommended guidelines for using the product. After 12 weeks, PwP will provide a second stool sample, which will be processed as above. They will also complete study measures for the second time.

A small sample of 70 patients will be recruited with 35 assigned to probiotic group and 35 assigned to placebo group. At study start participants will be required to provide a stool sample which will have the microbiome rDNA extracted and sequenced. Functional abilities and PD symptoms will be measured using the Unified Parkinson’s Disease Rating scale. Self-report measures of mood state, quality of life, bowel function, sleep quality and cognitive functioning will also be completed.

Collecting fecal samples:

It is important to pilot this version of the study because PwP patients are well known to have constipation problems and so may not be able to produce the sample as required. They will have several days to produce the sample at home (due to potential constipation issues) and our stabilisation kits can preserve samples for up to 90 days at room temperature. Thus, patient acceptability of study design is critically important to inform a full-scale study. It is not possible to acquire these data from a non-PD control group. Findings will inform whether this is a viable method to use with PD patients and how many samples were successfully collected. We will also be able to evaluate labelling, collection (of the sample from the patient) protocols, sample storage process and transfer for analyses.

Analysing microbiome rDNA from stool samples in PwP:

The technique for profiling microbiome rDNA from fecal samples has only recently become financially viable for this type of study; our pilot data will establish how many of the samples collected are viable (uncontaminated or the required amount collected), and the efficacy of storage and transfer protocols. Analyses of pilot data will also help establish how sequencing costs (which are still relatively expensive) fare against the quality and usefulness of the report produced (i.e. what does the report reveal, how sensitive are the data, are different microbiome species identified in an informative way, is there information about ratio of microbes etc.?). Pilot data will also establish whether it is worthwhile to engage in this process at two time points, study end and beginning to inform the protocol and financial estimates of a full-scale study.

Patient experience and patient feedback:

Patients will be provided with a booklet to record when they have taken the probiotic/placebo on each day of the study duration. The placebo is composed of sterile water, mango and passion fruit flavouring and carotene. It tastes smells and looks the same as Symprove™ and the Quality Assurance is to the same standard as the product according to manufacturers. However, to confirm this, at the end of the 12-week period, participants will be asked to complete a rating scale on ease of swallowing the product (probiotic or placebo), taste and texture and pleasantness/unpleasantness. PD patients often have swallowing difficulties as the disease progresses, and these data will indicate whether this is different in patients for placebo versus probiotic.

Patient attrition and adherence:

The patient experience questionnaires (ATC and ESS) provided data about patients’ reasons for attrition and/or non completion to inform a full-scale trial. These data will enable evaluation of the patient experience of taking part in the study, the experience of providing two stool samples and taking a daily capful of the placebo/probiotic liquid.

Patient Identification Centre (PIC):

Data from this study will establish how successfully suitable patients were identified from the chosen PIC site and whether targets were reached. Patients will be recruited via weekly PD clinics at the Royal Hallamshire Hospital. As part of the proposed study, we will record how many patients met inclusion and exclusion criteria and were suitable for the study and from this we can make estimates about the number of PIC sites needed for a full-scale study and whether adjustments to inclusion and excision criteria are required.

Patient cognitive-behavioural/mood state/QoL testing:

Patients recruited to the study will invariably be at different stages of their condition so study data will determine how long it takes for each patient to complete the selected measures, number of rest breaks needed, ease or difficulty of task completion and overall average completion time across the two sessions. Although cognitive-behavioural/mood state/QoL data will be analysed the cohort size (35 in each arm in this single study), is not large enough to make any statistical predictions about general populations. However, this pilot study will enable us to gauge the sensitivity of the measures for use in PD patients at different stages of the illness, whether some measures should be eliminated due to co-variance (i.e. they are measuring the same underlying factors) or retained for the full trial. Together these data should provide accurate test time duration for PD patients and an approximation of patient burden to inform the full-scale study.

Study design

Recruitment, Participants and PIC:

This is an exploratory pilot study. We will recruit a cross-section of 70 patients with idiopathic PD, as per the UK Brain Bank criteria (Gibb & Lees, 1988) and to conform to the recommended and optimal sample size, of 70 participants, for pilot studies (Teare, Dimario & Shephard, 2014).

Parkinson’s Disease patients who fulfil the UK PD Society Brain Bank criteria: <https://www.parkinsons.org.uk/research/parkinsons-uk-brain-bank> and who do not meet any of the exclusion criteria will be randomly assigned to one of the 2 groups, 35 participants randomly assigned to each arm of the study (probiotic or placebo).

The setting will include either the PD clinic at Royal Hallamshire Hospital Sheffield, UK, or at home setting, South Yorkshire and Northeast Derbyshire, Sheffield, UK. We plan to also recruit participants through the local PD UK meeting group. Interested participants will be invited to come along to clinic to take part through an advert in the PD newsletter so that can be properly screened for inclusion and exclusion criteria. We will use an internet based random generator app to ensure unbiased randomisation. All recruitment will take place at the Thursday Parkinson’s Disease clinic at the Royal Hallamshire Hospital. The appointed researcher will be present, and patients will be referred to her to determine interest. She will then provide initial information and answer questions. Consent will be taken at the first baseline assessment meeting along with the stool sample.

Inclusion and Exclusion Criteria:

Inclusion/eligibility:

1. Diagnosis of idiopathic Parkinson's disease based on UK PD Society Brain Bank criteria.

2. Capacity to consent and complete questionnaires.

3. Absence of gut/intestinal disorders that would prevent use of a probiotic and/or cause diarrhoea.

4. Absence of coincidental neurological condition.

5. Using l-dopa plus or minus a dopaminergic agonist.

6. Age over 18 and under 80

Exclusion:

1. Unable to consent.

2. Use of systemic antibiotics, antifungals, antivirals or antiparasitics (intravenous, intramuscular, or oral).

3. Use of commercial probiotics: includes tablets, capsules, lozenges, chewing gum or powders in which probiotic is a primary component. Ordinary dietary components such as fermented beverages/milks, yogurts, foods do not apply.

4. Acute viral/bacterial infection disease at the time of sampling (defer sampling until subject recovers). Acute disease is defined as the presence of a moderate or severe illness with or without fever.

5. Major surgery of the GI tract, with the exception of cholecystectomy and appendectomy, in the past five years. Any major bowel resection at any time.

6. History of active uncontrolled gastrointestinal disorders or diseases including: inflammatory bowel disease (IBD) including ulcerative colitis (mild-moderate-severe), Crohn's disease (mild-moderate-severe), or indeterminate colitis.

7. persistent, infectious gastroenteritis, colitis or gastritis, persistent or chronic diarrhea of unknown etiology, Clostridium difficile infection (recurrent) or Helicobacter pylori infection (untreated).

8. Presence of incidental neurological illness.

9. Use of stalevo or entacapone (as both can cause diarrhoea).

10. Experience of cancer or adenoma less than 5 years previously.

11. Age over 80

Materials and Measures:

Probiotic/Placebo:

70 ml of Symprove™ mango and passion fruit flavoured liquid probiotic or placebo will be measured by the participant in a small plastic cup provided by the manufacturer and taken daily, on an empty stomach, for 12 weeks. A standardised procedure provided by the manufacturer will be followed, in line with previous research studies that Symprove™ have collaborated on. No changes or alterations to the product or the procedure will be made.

Stool sample collection:

Human stool collection guidelines will be followed (see Appendix II) in accord with the Human Microbiome Core Sampling Protocols and use of Norgen Biotek stool collection system (<http://hmpdacc.org/doc/HMP_MOP_Version12_0_072910.pdf>). The following instructions, based on NHS recommendations, will be attached as to the PiS to guide the stool collection process.

Process/Instructions for collection:

- You will need at least 200mg-1 gram sample of material taken from your stool, this is equivalent to about half a teaspoon of butter.
- Do not urinate into the collection container. If urination does occur, discard the sample and collect a new sample.
- Place something in the **toilet** to catch the **stool**, such as a **potty** or an empty plastic food container or spread clean newspaper or plastic wrap over the rim of the **toilet** (we will provide a specific plastic sheet for this purpose).
- Make sure the stool **sample** doesn't touch the inside of the **toilet**.
- **Before** you take the sample using the scoop provided check your stool consistency against the stool chart provided.
- Use the spoon or spatula that comes with the container to place the sample in the tube provided.
- If the stool looks like examples 2-4 on the Bristol Stool Chart extract 200mg of material from either end and from the middle. If it looks like the other types extract material from three different locations of the stool (does not need to be either end and the middle)
- Transfer each scraping directly into the test tube provided.
- Screw down the lid tight and tilt tube up and down so that sample is immersed in liquid inside the tube.
- Place tube into sealed plastic bag provided and place in refrigerator until you go for your testing session at the hospital or the researcher comes to your home to collect it.
- Put anything you used to collect the sample in a plastic bag, tie it up and discard.
- Wash your hands thoroughly with soap and warm running water.

Microbiome measurement: 16S rRNA gene sequencing and compositional analysis:

A total of 140 samples for16S rRNAv4 Gene Sequencing and analysis n = 35 in each group, two groups (baseline and after probiotics/placebo treatment) will be collected. Each patient will have two samples collected, one before and one after probiotics/placebo treatment. Stool samples will be shipped to Diversigen (USA) for rDNA extraction and sequencing (See Appendix III)

Scientific background for Diversigen gene extraction/sequencing protocol:

16S rRNA gene sequencing methods were adapted from the methods developed for the NIH-Human Microbiome Project (1,2). Briefly, bacterial genomic DNA was extracted using MO BIO PowerSoil DNA Isolation Kit (MO BIO Laboratories).

The 16S rDNA V4 region was amplified by PCR and sequenced in the MiSeq platform (Illumina) using the 2x250 bp paired-end protocol yielding pair-end reads that overlap almost completely. The primers used for amplification contain adapters for MiSeq sequencing and single-end barcodes allowing pooling and direct sequencing of PCR products (3).

The 16S rRNA gene pipeline data incorporates phylogenetic and alignment-basedapproaches to maximize data resolution. The read pairs were demultiplexed based on the unique molecular barcodes, and reads were merged using USEARCH v7.0.1090 (4), allowing zero mismatches and a minimum overlap of 50 bases. Merged reads are trimmed at first base with Q5. In addition, a quality filter was applied to the resulting merged reads and reads containing above 0.05 expected errors were discarded.

Our pipeline for 16S analysis leverages custom analytic packages and pipelines developed at the CMMR to provide summary statistics and quality control measurements for each sequencing run, as well as multi-run reports and data-merging capabilities for validating built-in controls and characterizing microbial communities across large numbers of samples or sample groups.

16S rRNA gene sequences were clustered into Operational Taxonomic Units (OTUs) at a similarity cutoff value of 97% using the UPARSE algorithm (6). OTUs were mapped to an optimized version of the SILVA Database (7) containing only the 16S v4 region to determine taxonomies. Abundances were recovered by mapping the demultiplexed reads to the UPARSE OTUs. A custom script constructed a rarefied OTU table from the output files generated in the previous two steps for downstream analyses of alpha-diversity, beta-diversity (8), and phylogenetic trends.

References for sequencing protocol:

1. Human Microbiome Project, C. Structure, function and diversity of the healthy human microbiome. *Nature* 2012; 486(7402): 207-214.
2. Human Microbiome Project, C. A framework for human microbiome research. *Nature* 2012; 486(7402): 215-221.
3. Caporaso JG, Lauber CL, Walters WA, et al. Ultra-high-throughput microbial community analysis on the Illumina HiSeq and MiSeq platforms. *The ISME journal* 2012; 6(8): 1621-4.
4. Edgar RC. Search and clustering orders of magnitude faster than BLAST. *Bioinformatics* 2010; 26(19): 2460-1.
5. Caporaso JG, Kuczynski J, Stombaugh J, et al. QIIME allows analysis of high-throughput community sequencing data. *Nature methods* 2010; 7(5): 335-6.
6. Edgar. UPARSE: Highly accurate OTU sequences from microbial amplicon reads. *Nature Methods* 2013; 10 (10): 996-8.
7. Quast, C., E. Pruesse, P. Yilmaz, J. Gerken, T. Schweer, P. Yarza, J. Peplies and F. O. Glockner. The SILVA ribosomal RNA gene database project: improved data processing and web-based tools. *Nucleic Acids Res* 2013; 41(Database issue): D590-596.
8. Lozupone, C. and R. Knight. UniFrac: a new phylogenetic method for comparing microbial communities. *Appl Environ Microbiol* 2005; 71(12): 8228-**8235.**

Behavioural and Mood Measures:

Unified Parkinson’s Disease Rating Scale (UPDRS - Fahn et al,1987)

The UPDRS remains the gold standard for assessment of motor and non-motor symptoms associated with Parkinson’s Disease. The UPDRS workbook included in the study includes rating of mentation and behaviour, thought disorder, motivation, activities of daily living, motor function and also provide an overall Hoehn and Jahr (Hoehn and Yahr, 1967) staging level of the disease. Administration time: Approximately 30 minutes.

Quality of life (Jenkinson et al., 1997)

The PDQ-39 is designed to provide meaningful information yet place limited burden upon respondents. The PDQ manual reports the acceptability, usability, validity and reliability of the measure in assessing the concerns of individuals affected by Parkinson’s disease. The user manual specifies that the questionnaire is particularly appropriate for use in clinical trials to assess treatments and interventions intended to benefit people with Parkinson’s disease. Administration time: Approximately ten minutes.

Mood state: Depression: Beck Depression Inventory-II (BDI-II) Beck, Steer & Brown, 1996)

Depression is frequently seen in PD patients and contributes to poor quality of life and disability. The BDI-II is recommended for measuring severity of depression in PD patients (Schrag, Barone, & Brown, 2007). The BDI-II is a 21-item self-report multiple choice inventory. It is scored on a 4-point rating scale (0-3) depending upon severity of symptoms (0-13 = minimal depression, 14-19 mild depression, 20-28 moderate depression, 29-63 = severe depression). It takes around three minutes to complete

Mood State: Anxiety: State-Trait Anxiety Inventory (Spielberger et al., 1983)

Anxiety often accompanies depression in PD. The state-trait anxiety inventory (STAI) has been used in to measure anxiety in other PD studies. Romagnola, Fabbri and Merola et al., (2018) used this measure and found the presence of significant state/trait anxiety in PD patients. The Spielberger State-Trait Anxiety Inventory (Spielberger et al., 1983) is a well-known 40-item instrument, measuring respectively transient and enduring levels of anxiety. Data from heterogeneous community and psychiatric samples of older adults suggest adequate internal consistency and convergent validity (Kvaal, Ulstein, Nordhus, & Engedal, 2005). It takes around five minutes to complete.

Gastrointestinal Symptom Rating Scale (GSRS - Svedlund, Sjodin & Dotevall 1988).

This measure includes questions relating to 15 common gastrointestinal symptoms and requires patients to rate the severity of their symptoms over the past week or 2 weeks. It was developed from reviews of gastrointestinal symptoms and clinical experience, to evaluate common symptoms of gastrointestinal disorders. The GSRS contains 15 items, each rated on a seven-point Likert scale from no discomfort to very severe discomfort. Based on a factor analysis, the 15 GSRS items break down into the following five scales: abdominal pain (abdominal pain, hunger pains and nausea); reflux syndrome (heartburn and acid regurgitation), diarrhoea syndrome (diarrhoea, loose stools and urgent need for defecation), indigestion syndrome (borborygmus, abdominal distension, eructation and increased flatus) and constipation syndrome (constipation, hard stools and feeling of incomplete evacuation).The scores are calculated by taking the mean of the items completed within an individual scale, with higher scores indicating greater severity of symptoms. The GSRS in European patient populations has a good internal consistency reliability and acceptable construct validity and responsiveness. The GSRS can be administered in either self-report or interview format. The task takes around one minute to complete.

Cognitive Measure: FAS Cognitive Initiation Task (Benton & Hamsher 1976).

Non-motor cognitive dysfunction is commonly reported in PD and executive functions (higher-order cognitive processes) seem to be particularly vulnerable to disease processes in PD. The FAS is a speedy, easy to administer frequently used measure of cognitive *movement* in the form of strategy initiation (termed verbal fluency), a key executive function. The **F-A-S Test** assesses phonemic **verbal fluency** by requesting an individual to orally produce words that begin with the letters F, A and S. Individuals are typically given 1 min to name as many words as possible beginning with one of the letters. The procedure is then repeated for the remaining two letters. The task takes three minutes to complete and provides a reliable index of executive dysfunction.

Sleep: The Parkinson’s disease Sleep Scale (Chaudhuri, Pal, DiMarco, Whately-Smith et al., 2002).

Sleep disturbances are almost universally experienced by patients with PD and can arise from discomfort due to symptoms, restlessness, disruption to sleep regulation systems, nightmares etc. The PDSS is a validated, simple to use, bedside clinical instrument that provides a semiquantitative assessment of the multifactorial nature of sleep problems in Parkinson’s disease. The PDSS is a visual analogue scale addressing 15 commonly reported symptoms associated with sleep disturbance. The 15 items chosen are based on audit of factors causing sleep disturbances in over 800 patients with Parkinson’s disease attending outpatient hospital clinics (between 1996 and 2000). The scale takes around three minutes to complete.

Milestones:

| Date | Activity | Assigned to: | Milestone |
| --- | --- | --- | --- |
| January-March 2019 | Preparation of detailed protocol and HRA documentation for IRAS NHS ethics | Barker and Jordan, contributions from team | Milestone # 1  Ethics documentation |
| February-April 2019 | RA appointment and training | Barker,  Holly Ashton (later Wilkinson) appointed | Milestone # 2  RA Appointment |
| 13th May 2019 | Ethical Review Panel Meeting | Barker and Ashton |  |
| May-June 2019 | MHRA and ethics approvals | Barker, Ashton, Dalton, Jordan | Milestone # 3  Approvals |
| July-August 2019 | Commence recruitment process:  (i) random blind allocation of patients to control (*n* = 35) or experimental group (*n* = 35).  (ii) Baseline symptom evaluation to categorise patient’s symptom severity and gastrointestinal rating scale.  (iii) Baseline behavioural measures.  (iv) Baseline fecal sample followed by extraction. | Barker, Corfe, Ashton, Jordan | Milestone # 4  Baseline data collection |
| August-October 2019 | (i) Complete 12-week programme of probiotic or placebo | Ashton, Jordan, Barker, Corfe | Milestone # 5  Experimental stage |
| October - November 2019 | (i) End of probiotic/placebo stage  (ii) Final testing: symptoms, behavior, fecal sample  (iii) Organisation of data files for analysis | Ashton, Jordan, Barker, Corfe, Sanders, Dalton | Milestone # 5  Data collection complete |
| December 2019 - January 2020 | (i) Data analyses  (ii) Manuscript preparation  (iii) Preparation of follow-on grant submission (s) | Barker, Corfe, Sanders, Jordan, Dalton, Carter, Kudiersky | Milestone # 6  Data Analyses  Study end |

Blinding:

Research personnel recruiting participants to the study and assigning them to study arm were blind to the group assignation - probiotic or placebo. Only the CI – who generated randomisation codes using an internet based random generator codes was unblinded. Research staff remained blind after data collection and preliminary analyses until the point of statistical analyses of groups. PwP did not know whether they were in the probiotic or placebo group until the end of data collection. The protocol for participants was identical, they all completed the same measures and were required to ingest the product daily (probiotic or placebo). The only difference across groups was the product.

Expertise of Chief Investigator and team:

The proposed project is a collaborative partnership between SHU, The University of Sheffield, Sheffield Teaching Hospitals and Symprove™ <https://www.symprove.com> is providing the placebo and probiotic. Symprove™ is widely available at pharmacies and online for anyone to purchase.

Dr Lynne Barker is an Associate Professor in Cognitive Neuroscience, Centre for Behavioural Science and Applied Psychology (CeBSAP), Dept., of Psychology, Sheffield Hallam University, and has a track record of delivering high quality and rigorous work with diverse neuropathological groups, including new assessment techniques and treatment initiatives, Medipex Award winner for innovative technology in the NHS 2015. See <https://cdn2.researchoutreach.org/wp-content/uploads/2019/02/Lynne-Barker.pdf>

Barker is an expert on brain anatomy, function and dysfunction and a pioneer investigating the microbiome in PwP.

<https://www.google.co.uk/books/edition/How_to_Build_a_Human_Brain/LzwPEQAAQBAJ?hl=en&gbpv=1&printsec=frontcover>

Professor David. S. Sanders, MD, FRCP, FACG: Consultant & Professor of Gastroenterology at the Royal Hallamshire Hospital, Sheffield Teaching Hospitals NHS Trust & the University of Sheffield, published >400 peer reviewed papers (H-score > 50) and internationally recognised for work in coeliac disease, gastrostomy feeding and small bowel endoscopy. Received a European Rising Star Award and in 2011 the Cuthbertson Medal and finally the Silver Medal in 2017.

Dr Bernard Corfe: Senior Lecturer in Oncology, Principal Investigator in Molecular Gastroenterology, Department of Oncology & Metabolism, University of Sheffield. Expertise in diet, nutrition, irritable bowel, appetite, and microbiome studies.

Dr Caroline Dalton: Reader in Neuroscience and Genetics, Department of Biosciences and Chemistry, Sheffield Hallam University, Sheffield. Dr Dalton is a neuroscientist and geneticist with expertise in neurodegeneration, pharmacogenetics, epigenetics, obesity and diabetes.

Dr Caroline Jordan: ECR in health behaviour. Research fellow in CeBSAP (Centre for Behavioural Science and Applied Psychology).

Holly Ashton (now Wilcockson) Research Associate on the project (RA), CeBSAP. Holly has just completed an RA post on an MRC funded project investigating a new interactive computerised task created by Dr Lynne Barker and her team. She has been working with traumatic brain injury and stroke patients at Rotherham Doncaster and South Humber NHS Trust and working with mild cognitive impaired (MCI) patients at Sheffield Teaching Hospitals. She has extensive experience of working with neurological groups in a research capacity.

Dr Anouska Carter: Research fellow and Lead Physical activity, Wellbeing and Public health Research. Collaborator and PI on our microbiome/probiotic study with people with MS.

Dr Nicholas Kudiersky: Research Fellow, Clinical Exercise Physiologist, experience of working on our other collaborative study investigating probiotic use and microbiome composition in people with MS.

Ethical considerations:

Gastrointestinal problems are a defining feature of PD so we would expect patients to present with problematic bowel function at the start of the pilot study prior to assignation to study group. It is possible that there may be adverse effects caused by the probiotic, but these may be because the probiotic is ‘working’ and these changes may only be temporary. Transient bowel changes may cause discomfort or concern for the participant so the PiS details what the participant should do if this occurs. We have restricted symptom and quality of life measurements to before and after 12 weeks of taking of the probiotic/placebo to minimize patient burden. We do not anticipate that drinking the probiotic or placebo each morning would cause any lifestyle change, but we will be measuring patient experience with the Patient Questionnaires.

This study is an exploratory pilot designed to determine the feasibility of conducting research with PwP and to evaluate study design, specifically, patient selection, recruitment, adherence, acceptability and attrition, to inform a full-scale study. Data collected in this pilot study will facilitate prediction of sample size and Power needed for a full-scale study. We will test patients at the same time of day on both testing sessions to try to minimize fluctuations due to on/off periods. Patients will not be required to change their medication regime or alter their activities of daily living in any way. Patients on certain kinds of medication will be excluded (Stalevo or Entacapone) because they can cause diarrhea which will interfere with stool sample provision. Patients will be instructed to consume the probiotic and placebo exactly in line with manufacturers ‘over-the counter’ recommendations. We have considered our exclusion criteria carefully through joint discussion and shared expertise among the research team and by reviewing other probiotic studies and have selected exclusion criteria that relate to gut abnormalities, probiotic use, or coincidental neurological problems that would indicate multiple neurological conditions beyond Parkinson’s Disease (PD).

We have selected measures in the study that have been validated for use with PD patients. We will be measuring symptoms of PD using the UPDRS (which remains the gold standard for assessing PD symptoms) at baseline and outcome to see whether there is any change in symptom profile for patients and placebo group. We felt that wellbeing could not be evaluated without measuring mood state and any potential changes to mood state over the 12-week period, as low mood is frequent in PD patients. The team have drawn on their combined clinical and research experience for the best measures to use in the study, considering brevity, ease of administration, reliability and sensitivity for use with PD patients. Again, we will evaluate the reliability, sensitivity and potential co-variance of these measures using statistical analyses to establish whether there is measure overlap (and therefore redundancy), whether the measures are sensitive to the different stages of the condition, and whether they should be retained for a full-scale study.

Over the past decade research findings have identified a complex bidirectional interaction between the gastrointestinal tract (GI) and the central nervous system (CNS) the Gut- Brain axis (Braak et al., 2006). It is now known that different levels of the Gut-Brain axis including the autonomic nervous system (ANS) and the enteric nervous system (ENS) are affected by PD. Also research now suggests that gut-brain interactions are influenced by the gut microbiota (see review in protocol).

We will objectively measure gut microbe composition through rDNA extraction and analyses of bacteria within fecal samples. This information will provide us with an overview of the gut microbiome in PwP before probiotic use and whether this changes in the probiotic group compared to baseline and compared to the placebo group. Presently, companies in Europe and the US seem to be leading in techniques that require extraction of bacterial DNA from human stools and DNA sequencing to identify microbiome species. In this study participants will be required to provide two stool samples, one at baseline and one at the end of the study. We will use Norgen’s stabilisation kit to collect the samples because the kit contains a solution that will destroy any viruses and stabilises the sample so that it does not need to be stored at -80 degrees. This maximises safety of transit and handling of samples. We will store collected samples in refrigerators at the University of Sheffield Medical School before transit in batches through shipping courier to Diversigen in the US. All samples will be coded with a number identifier following the companies detailed protocol for anonymisation, coding and transport of samples (these are uploaded as attachments). Samples will have no information relating to participants. Dr Bernard Corfe and Dr Caroline Dalton have prior experience of DNA sequencing research and have advised on the best protocol. The pilot and feasibility data collected here will ascertain how useful and informative the two reports (and two samples) are in relation to the cost of sequencing for microbes per patient. Questionnaire data will provide information about the provision of fecal material by patients and collection and storage protocols will be evaluated to determine best practice.

Funding:

This proposal was reviewed by Sheffield Hallam University (SHU-REC) and successfully acquired funding through competitive call, for the Creating Knowledge Implementation Platform (CKIP) funding. Symprove™ probiotic manufacturer provided the probiotic and placebo for free. Symprove™ had no input in study design, data collection or analyses and had no IP ownership of any component of the study.

We have set the sample size to 70 because this number is reported as being adequate for pilot studies and because of the study time-frame (Teare, Dimario & Shephard et al., 2014). Although, this is only a pilot we want the study to be as rigorous as possible so that we have rich and reliable data to inform the full-scale study. So, this pilot study is a double-blind randomised placebo-controlled study. We have chosen this design because it minimises bias in the selection process and enhances study rigour.

The CI will know which groups participants are assigned too, randomisation will occur using an online randomisation tool, but the RA collecting the data will not know whether participants are assigned to probiotic or placebo and neither will participants.

We have reviewed the literature on gut function in Parkinson’s disease, the gut microbiome, and data showing which probiotics are most effective at delivering live microorganisms to the gut. Three members of the research team (Barker, Sanders & Corfe) have attended research seminars hosted by Symprove™ at the Royal Hallamshire Hospital that made us consider use of this product in our study. We have reviewed all the independent research trials using Symprove™ and some data under NDA not yet published and had ongoing discussion with the company owner Barry Smith. Symprove™ provide both probiotic and placebo for free for all research studies using their product, and we plan to follow this protocol but make no claim on study method, design or findings. The Symprove™ placebo has been used in all other clinical trials using the probiotic so we decided that the safest option for participants is to use this (already well studied) placebo rather than devising our own. The placebo is sterile water, mango and passion fruit flavouring and carotene. It tastes smells and looks the same as Symprove™ and the QA is to the same standard as the product according to manufacturers. Participants will follow manufacturers recommendations regarding daily dosage.

We have reviewed the trials registered on ClinicalTrials.Gov using the search terms probiotics, gut, Parkinson’s disease. There are several studies investigating various elements of gut function and probiotics but generally they are not with PD patients, most studies with PD patients are concerned with medication absorption across various drugs so our study will be unique in this respect. The study will be the first to combine probiotic/placebo with PD patients and investigate the microbiome.

Professor Sanders and Corfe have extensive experience of clinical work with patients with PD and patients with gut problems and they have informed the study design and the choice of exclusion criteria. Patients often complain most about gut problems and recent research indicates the gut problems may precede other symptoms of this condition by several years (Lebouvier et al., 2010) so any improvement to gut function should be a positive outcome for PD patients.

We have selected measures in the study that have been validated for use with PwP. We will be measuring symptoms of PD using the UPDRS (which remains the gold standard for assessing PD symptoms) at baseline and outcome. We will only use one cognitive task to minimise patient burden. Participants will complete the FAS (Benton, Hamsher & Sivan, 1978) verbal fluency/cognitive initiation task that measures ability to initiate cognitive strategic processes rather than ability to initiate motor function (indexed by the UPDRS). The test has dual-versions so we can counterbalance across the two assessment points. Participants are allotted one minute per letter to generate as many words (according to some prior rules) beginning with the target letter in one minute. The total task three minutes to administer and is supported by extensive research indicting sensitivity to neuropathology.

The team have drawn on their combined clinical and research experience for the best measures to use in the study, considering brevity and ease of administration and reliability and sensitivity for use with PD patients. Data obtained in this pilot will evaluate the measures used including time to complete tasks and reliability and sensitivity of tasks.

Recruitment: PD patients are highly motivated to engage in research so we anticipate no problems with our recruitment targets – we will draw on NHS patients from the Thursday PD clinic at the RHH who will be informed of the study by their consultants during their appointments which is the standard approach that the clinic uses a standard recruitment procedure. Consultants will only discuss the study with patients whom they consider have capacity and the ability to grasp the study process and any potential risks/benefits.

The research associate will attend the weekly PD clinics and meet with any of the patients who express an interest in the study and run through the PiS with them and answer any questions. They will have 24 hours to decide whether they want to consent to the study.

Patients can come into hospital for their initial testing or can complete this at home whichever they prefer. Stool samples will be collected and coded in week 1 of the study and the probiotic or placebo distributed. Follow-up testing at 12-weeks will be similarly conducted.

Evidence of Equipoise:

All participants allocated to placebo group will have the option of provision of Symprove™ for free for the 12-week period the same as the probiotic group.

Service user involvement:

We did not conduct extensive PPI for the current study because it is well established through decades of patient and clinical reports that gastrointestinal problems are a key and debilitating symptom in PwP. However, we discussed potential study design with three PwP who acted as Lived Experience Reviewers (Protocol see section 2 – page 10)

References:

Aarsland, D., Andersen, K., Larsen, J.P., Perry, R. & Wentzel-Larsen T, et al. (2004)

The rate of cognitive decline in Parkinson disease. *Archives of Neurology*, 61: 1906–1911.

Beck, A.T., Steer, R.A., & Brown, G.K. (1996). Manual for the Beck Depression Inventory-II. San Antonio, TX: Psychological Corporation.

Benton, A.L, & Hamsher, K. (1976). Multilingual Aphasia Examination manual. University of Iowa; Iowa City.

Berg, D., Postuma, R.B., Bloem, B. et al., (2014). Time to redefine PD? Introductory statement of the MDS Task Force on the definition of Parkinson’s disease. *Movement Disorders*, 29:454–462.

Braak, H., de Vos, R.A., Bohl, J., Del Tredici, K. (2006) Gastric alpha-synuclein

immunoreactive inclusions in Meissner’s and Auerbach’s plexuses in cases staged

for Parkinson’s disease-related brain pathology. *Neuroscience Letters,* 396: 67–72.

Borre, Y.E., Moloney, R.D., Clarke, G., Dinan, T.G., Cryan, J.F., (2014). The impact of

microbiota on brain and behavior: mechanisms & therapeutic potential. Adv. Exp.

Med. Biol. 817, 373–403.

Bull, M.J. & Plummer, N.T. (2014). Part 1: The human gut microbiome in health and disease. *Integrative Medicine*, (Encinitas), 13:17-22.

Chaudhuri, K. R., Pal, S., DiMarco, A., Whately-Smith, C et al., (2002). The Parkinson’s Disease sleep scale: A new instrument for assessing sleep and nocturnal disability in Parkinson’s disease. *Journal of Neurology, Neurosurgery and Psychiatry*, 73, 629-635.

Chaudhuri, K.R., Healy, D.G. & Schapira, A.H. (2006) Non-motor symptoms of

Parkinson’s disease: diagnosis and management. *Lancet Neurology*, 5: 235–245.

Fahn S., Elton R.L., and Members of the U.P.R.D.S. Development Committee. (1987) Unified Disease Rating Scale. In Fahn S., Marsden C., Calne D. and Goldstein M. (eds) Recent Developments in Parkinson's Disease, Volume 2. Florham Park, New Jersey: Macmillan Health Care Information.

Gibb, W.R.G., & Lees, A.J. (1988) The relevance of the Lewy body to the pathogenesis of idiopathic Parkinson’s disease. *Journal of Neurology, Neurosurgery & Psychiatry,* 51:745–752.

Goetz, C.G., Emre, M., Dubois, B. (2008). Parkinson's disease dementia: definitions,

guidelines, and research perspectives in diagnosis. *Annals of Neurology*, 64.

Guzzetti, S., Mancini, F., Caporali, A. & Manfredi, L. (2019). The association of cognitive reserve with motor and cognitive functions for different stages of Parkinson’s disease. *Experimental Gerontology*, 115, 79-87.

Hoehn M.M. & Yahr M.D. (1967) Parkinsonism: onset, progression and mortality.

*Neurology*, 17: 427-442.

Hurwitz, B. (2014). Urban observation and sentiment in James Parkinson’s essay on the shaking palsy (1817). *Literature and Medicine*, 32, 74-104.

Kaye, J., Gage, H., Kimber, A., Storey, L., & Trend, P. (2006) Excess burden of

constipation in Parkinson’s disease: a pilot study. *Movement Disorders*, 21: 1270–1273.

Keshavarziana, A., & Kranevelda, A. D. (2017). The gut-brain axis in Parkinson’s disease: Possibilities for food-based therapies. *European Journal of Pharmacology*, 817, 86-95.

Kvaal, K., Ulstein, I., Nordhus, I. H., & Engedal, K. (2005). The Spielberger State-Trait Anxiety Inventory (STAI): The state scale in detecting mental disorders in geriatric patients. *International Journal of Geriatric Psychiatry*, 20, 629-634.

Jenkinson C., Fitzpatrick R., Peto V., Greenhall R., Hyman N. (1997) The

Parkinson’s Disease Questionnaire (PDQ-39): Development and validation of a

Parkinson’s disease summary index score. *Age and Ageing*; 26: 353-357.

Kudlicka, A., Clare, L., Hindle, J.V. (2011). Executive functions in Parkinson's disease:

systematic review and meta-analysis. *Movement Disorders*, 26, 2305–2315.

Lebouvier, T., Neunlist, M., Bruley des Varannes, S., Coron, E., Drouard, A., et al. (2010) Colonic Biopsies to Assess the Neuropathology of Parkinson’s Disease

and Its Relationship with Symptoms. *PLoS ONE*, 5(9).

Moher, D., Glasziou, P., Chalmers I., et al. (2016). Increasing value and reducing waste in biomedical research: who's listening? *Lancet*, 387:1573–86.

Nussbaum, R.L., Ellis, C.E., 2003. Alzheimer's disease and Parkinson's disease. N. Engl.

J. Med. 348, 1356–1364.

Perez-Pardoa, P., Kliest, T., Dodiya, H. B., Broersen, L. M., Garssen, J., Keshavarsian, A., & Kraneveld, A. D. (2017). The gut-brain axis in Parkinson's disease: Possibilities for food-based therapies. *The European Journal of Pharmacology*, 817, 86-95.

Pfeiffer RF (2003) Gastrointestinal dysfunction in Parkinson’s disease. *Lancet*

*Neurology*, 2: 107–116.

Qualman, S.J., Haupt, H.M., Yang, P. & Hamilton, S.R. (1984) Esophageal Lewy bodies

associated with ganglion cell loss in achalasia. Similarity to Parkinson’s disease.

*Gastroenterology*, 87: 848–856.

Romagnola, A., Fabbri, M., & Merolka, A. (2018). Beyond 35 years of Parkinson’s disease: A comprehensive clinical instrument. *Journal of Neurology*, 265, 1989-1997.

Roheger, M., Kalbe, E., Liepelt-Scarfone, I. (2018). Progression of cognitive decline in

Parkinson's disease. J. Parasit. Dis. 8, 183–193. <https://doi.org/10.3233/JPDS>

Schrag A, Barone P, Brown RG, et al., (2007). Depression rating scales in Parkinson's disease: critique and recommendations. *Movement Disord*ers, 22(8):1077–1092. doi:10.1002/mds.21333

Spielberger C.D., Gorsuch, R.L., Lushene, P.R., Vagg, P.R., & Jacobs, A.G. (1983).

Manual for the State-Trait Anxiety Inventory. Consulting Psychologists Press, Inc.: Palo Alto.

Svedlund, J., Sjodin, I., & Dotevall, G. (1988). GSRS–A clinical rating scale for gastrointestinal symptoms in patients with irritable bowel syndrome and peptic ulcer disease. Dig Dis Sci, 33: 129–134).

Teare, D.M., Dimario, M., Shephard, N., et al. (2014). Sample size requirements to estimate key design parameters from external pilot randomised controlled trials: a simulation study. *Trials*, 2014: 15:264

Valdes, A. M., Walter, J., Segal, E. & Spector, T. D. (2018). Role of the gut microbiota in nutrition and health. *BMJ*, 361, 36-44.

Appendix 1

**Figure 1 and 2**: from Perez-Pardo et al., 2017, illustration of potential mechanism of GI contribution to neurological conditions and possible route of efficacy of probiotic.


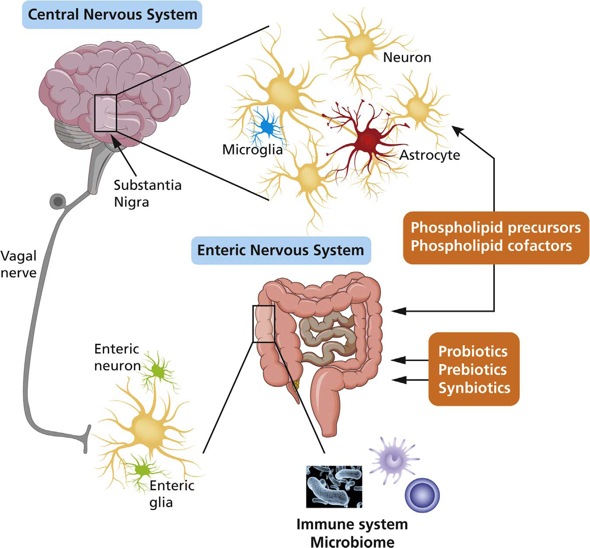

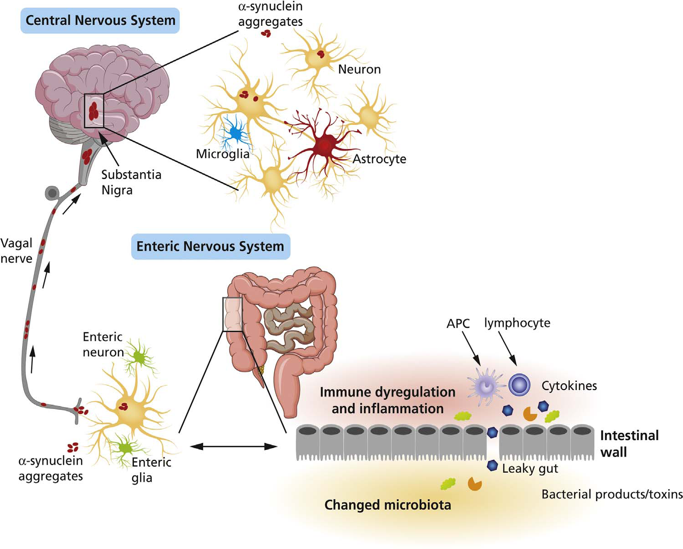


Appendix II


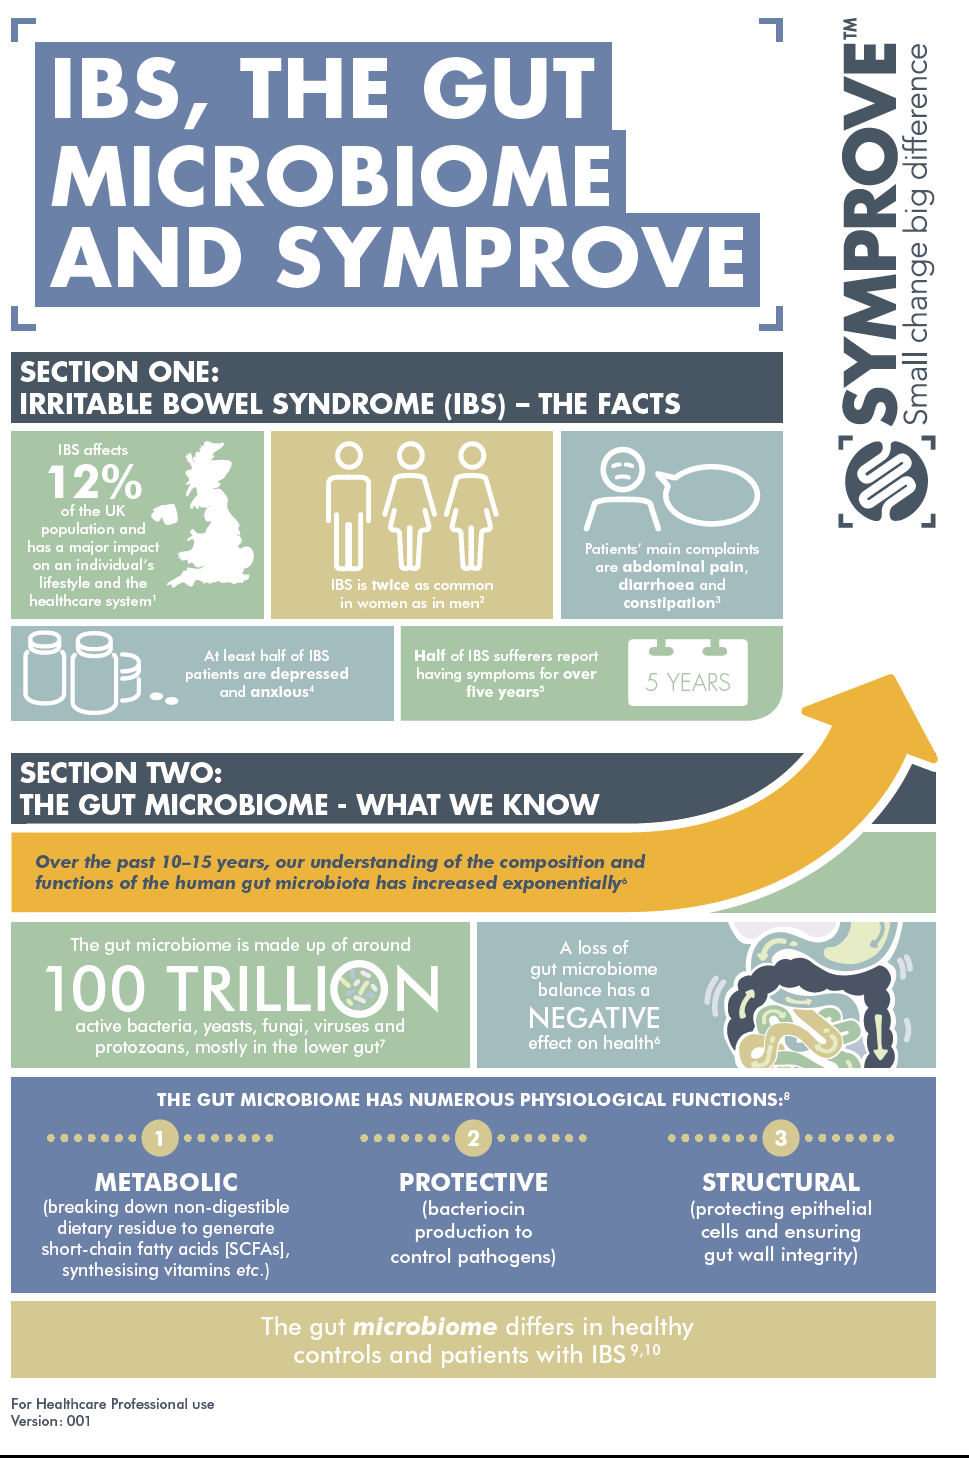


Appendix III


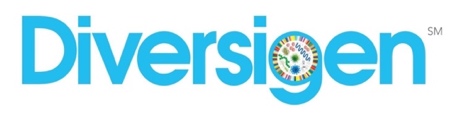


**INSTRUCTIONS FOR SHIPPING SAMPLES TO OUR LABORATORY**

Thank you for choosing Diversigen. To ensure the integrity of samples as well as the efficiency of sample intake and processing, we recommend that you follow the instructions below when shipping samples to our lab.

- Complete two forms; the Metadata Capture Form (MCF) used to identify your samples and the Chain of Custody form used to document and track the shipment of your samples. Email the completed documents to Alice Hill at [ahill@diversigen.com](mailto:ahill@diversigen.com). Please include hard copies of both forms along with the shipment.
- Instruction for completing the MCF:

Samples should be arranged and labeled exactly as specified in the MCF. If samples are organized by column and row within a box or 96-well plate, provide sample positions in the MCF. When shipping samples in bags, make sure to label each bag and write sample IDs and total number samples of each bag in the MCF. Please provide the following information in the MCF:

SampleID: this in a unique ID of the sample

OtherID:optional secondary ID which may be relevant for analysis. It does not have to be unique.

SampleSource: a brief description of the sample source, i.e., “human”, “murine”, “environmental”

SampleType: description of the sample source for example “stool” or nasal swab”

SamplePosition: the location of each sample within the shipment.

Variable: Please provide any additional information that you think necessary with regards to the batch you’re shipping.

- Samples should be shipped overnight with dry ice. We recommend using 5-8 Ibs of dry ice for shipping samples. Please verify with your courier that this recommended amount of dry ice is available.
- We recommend FedEx and UPS for shipment; USPS is not recommended.
- We generally advise shipping samples early in the week (Monday through Wednesday) to ensure they arrive during the work week. We also advise shipping more than two days before a major holiday to prevent samples from spending extended time in transit which might jeopardize sample integrity and affect turnaround time. Please notify Diversigen when a shipment is made so that it can be tracked and monitored for unexpected circumstances.

If you have any questions or concerns please contact Alice Hill [ahill@diversigen.com](mailto:ahill@diversigen.com) , Lucia Martini at [lmartini@diversigen.com](mailto:lmartini@diversigen.com) or Julia Cope at [jcope@diversigen.com](mailto:jcope@diversigen.com).

**Please ship samples to:**

1 Baylor Plaza

Attn: Dr. Matthew Ross

Room 825E

Houston, TX 77030

Tel: 713-798-7362

Appendix IV

**Adherence to Study (ATS) Questionnaire**

*Thank you for taking part in our study. We are trying to assess how it was for you to participate in this research and would appreciate your feedback.*

*Please respond to each statement in the grid using the following scale:*

*1 = Not at all 2 = Not really 3 = Somewhat 4 = Quite a lot 5 = Very much*

|  | 1  Not at all | 2  Not really | 3  Somewhat | 4  Quite | 5  Very  much |
| --- | --- | --- | --- | --- | --- |
| Do you feel that the information provided at the sign-up to this study was informative enough? |  |  |  |  |  |
| Was it easy to understand what was required of you in this research? |  |  |  |  |  |
| Are you happy with the consent process for taking part in the research? |  |  |  |  |  |
| Did you find it easy to take the prescribed drink each day? |  |  |  |  |  |
| Did you feel you had enough contact with the research team? |  |  |  |  |  |
| Were you happy to be randomly allocated to placebo/probiotic study arm? |  |  |  |  |  |

We are interested in your experience of providing stool samples as part of this research. We would be grateful for your feedback.

1. Were you comfortable with providing stool samples as part of this research?

Yes No Indifferent

2. Did you have any difficulties with collecting/providing a stool sample?

Yes No

3. It would be helpful for us and other patients if you could describe any difficulties below associated with collecting the sample *(e.g. was there an issue due to constipation, did you find the act of collecting the sample physically difficult, did you find it overly unpleasant?)*

We are interested in your experiences of the Symprove™ product you had to take each day. Please respond by circling the relevant comment on the scale.

1. The Symprove™ product tasted good

| Completely Disagree | Slightly Disagree | Neither Agree nor Disagree | Slightly  Agree | Completely Agree |
| --- | --- | --- | --- | --- |

2. I liked the flavour of the Symprove™ product

| Completely Disagree | Slightly Disagree | Neither Agree nor Disagree | Slightly  Agree | Completely Agree |
| --- | --- | --- | --- | --- |

3. I liked the texture of the Symprove™ product

| Completely Disagree | Slightly Disagree | Neither Agree nor Disagree | Slightly  Agree | Completely Agree |
| --- | --- | --- | --- | --- |

4. I found the Symprove™ product easy to swallow

| Completely Disagree | Slightly Disagree | Neither Agree nor Disagree | Slightly  Agree | Completely Agree |
| --- | --- | --- | --- | --- |

5. I was happy to take the Symprove™ product each morning

| Completely Disagree | Slightly Disagree | Neither Agree nor Disagree | Slightly  Agree | Completely Agree |
| --- | --- | --- | --- | --- |

Although you were not aware which condition you were in, you may have suspected you were in a particular group. Please indicate which group you suspect you were in by circling an option below:

Probiotic Placebo No idea

If you suspected you were in a particular group, why was this? Please tick all statements that apply:

- - I feel better than I did at the start of the study
  - I feel worse than I did at the start of the study
  - I feel no different than I did at the start of the study
  - I feel more energetic than I did at the start of the study
  - I feel like I have had fewer physical symptoms
  - I feel like I have had fewer cognitive symptoms
  - My family/friends say they have noticed a change in me
  - Other - please describe

Thinking about people who refused to take part in this research, what do you think would be the main factor putting them off? Please tick all statements that apply:

- - Having to provide stool samples
  - The length of the study
  - The commitment to drink the probiotic/placebo every day
  - Not feeling well enough to take part
  - Not interested in the research
  - Other (please describe)

Do you have any other comments you wish to share with us about your experience on this research project?

Many thanks!

Appendix V

**Exit Study Scale (ESS)**

*Thank you for taking part in our study. As you opted to leave this research before the end of the study, we would appreciate if you could spare some time to help us understand your reasons for doing so.*

What was your main reason for not completing the study? Please tick any that are relevant.

- - Having to provide stool samples
  - The length of the study
  - Too much of a commitment
  - I didn't like the probiotic/placebo drink
  - I was worried the probiotic/placebo drink was affecting me negatively
  - Not feeling well enough to take part
  - Not interested in the research
  - Other (please describe)

*Please respond to each statement in the grid using the following scale:*

*1 = Not at all 2 = Not really 3 = Somewhat 4 = Quite a lot 5 = Very much*

|  | 1  Not at all | 2  Not really | 3  Somewhat | 4  Quite | 5  Very  much |
| --- | --- | --- | --- | --- | --- |
| Do you feel that the information provided at the sign-up to this study was informative enough? |  |  |  |  |  |
| Was it easy to understand what was required of you in this research? |  |  |  |  |  |
| Are you happy with the consent process for taking part in the research? |  |  |  |  |  |
| Did you find it acceptable to take the prescribed drink each day? |  |  |  |  |  |
| Did you feel you had enough contact with the research team? |  |  |  |  |  |
| Were you happy to be randomly allocated to placebo/probiotic study arm? |  |  |  |  |  |
| Overall, are you glad you took part in this research? |  |  |  |  |  |

We are interested in your experience of providing stool samples as part of this research. We would be grateful for your feedback.

1. Were you comfortable with providing stool samples as part of this research?

Yes No Indifferent

2. Did you have any difficulties with collecting/providing a stool sample?

Yes No

3. It would be helpful for us and other patients if you could describe any difficulties below associated with collecting the sample *(e.g. was there an issue due to constipation, did you find the act of collecting the sample physically difficult, did you find it overly unpleasant?)*

We are interested in your experiences of the Symprove™ product you had to take each day. Please respond by circling the relevant comment on the scale.

1. The Symprove™ product tasted good

| Completely Disagree | Slightly Disagree | Neither Agree nor Disagree | Slightly  Agree | Completely Agree |
| --- | --- | --- | --- | --- |

2. I liked the flavour of the Symprove™ product

| Completely Disagree | Slightly Disagree | Neither Agree nor Disagree | Slightly  Agree | Completely Agree |
| --- | --- | --- | --- | --- |

3. I liked the texture of the Symprove™ product

| Completely Disagree | Slightly Disagree | Neither Agree nor Disagree | Slightly  Agree | Completely Agree |
| --- | --- | --- | --- | --- |

4. I found the Symprove™ product easy to swallow

| Completely Disagree | Slightly Disagree | Neither Agree nor Disagree | Slightly  Agree | Completely Agree |
| --- | --- | --- | --- | --- |

5. I was happy to take the Symprove™ product each morning

| Completely Disagree | Slightly Disagree | Neither Agree nor Disagree | Slightly  Agree | Completely Agree |
| --- | --- | --- | --- | --- |

Although you were not aware which condition you were in, you may have suspected you were in a particular group. Please indicate which group you suspect you were in by circling an option below:

Probiotic Placebo No idea

Do you have any other comments you wish to share with us about your experience on this research project?

**Thank You!**
