# Supplementary material
Source: Research Square preprint supplement (doi:10.21203/rs.3.rs-7236057/v1)
Supplement: Supplementary file 3 [file e1755ecac4bee2d801f7a57e.docx]

|  | Section/topic | No | CONSORT 2025 checklist item description | Reported on page no. |
| --- | --- | --- | --- | --- |
|  | **Title and abstract** | | |  |
|  | Title and structured abstract | 1a | Identification as a randomised trial | Page 1 and throughout |
|  | **Open science** | | |  |
|  | Trial registration | 2 | Name of trial registry, identifying number (with URL) and date of registration | Page 1 |
|  | Protocol and statistical analysis plan | 3 | Where the trial protocol and statistical analysis plan can be accessed | Not available as data are unpublished |
|  | Data sharing | 4 | Where and how the individual de-identified participant data (including data dictionary), statistical code and any other materials can be accessed | Page 43 |
|  | Funding and conflicts of interest | 5a | Sources of funding and other support (eg, supply of drugs), and role of funders in the design, conduct, analysis and reporting of the trial | Page 19 |
|  | 5b | Financial and other conflicts of interest of the manuscript authors | Page 43 |
|  | **Introduction** | | |  |
|  | Background and rationale | 6 | Scientific background and rationale | Page 4 |
|  | Objectives | 7 | Specific objectives related to benefits and harms | Page 16 (HRA) |
|  | **Methods** | | |  |
|  | Patient and public involvement | 8 | Details of patient or public involvement in the design, conduct and reporting of the trial | Page 43 |
|  | Trial design | 9 | Description of trial design including type of trial (eg, parallel group, crossover), allocation ratio, and framework (eg, superiority, equivalence, non-inferiority, exploratory) | Page 9 |
|  | Changes to trial protocol | 10 | Important changes to the trial after it commenced including any outcomes or analyses that were not prespecified, with reason | Page 31 |
|  | Trial setting | 11 | Settings (eg, community, hospital) and locations (eg, countries, sites) where the trial was conducted | Page 8 |
|  | Eligibility criteria | 12a | Eligibility criteria for participants | Page 9 |
|  | 12b | If applicable, eligibility criteria for sites and for individuals delivering the interventions (eg, surgeons, physiotherapists) | N/A |
|  | Intervention and comparator | 13 | Intervention and comparator with sufficient details to allow replication. If relevant, where additional materials describing the intervention and comparator (eg, intervention manual) can be accessed | Page 10 |
|  | Harms | 14 | How harms were defined and assessed (eg, systematically, non-systematically) | Page 16 (HRA) |
|  | Sample size | 15a | How sample size was determined, including all assumptions supporting the sample size calculation | Page 9 |
|  | 15b | Explanation of any interim analyses and stopping guidelines | Page 32 |
|  | Randomisation: |  |  |  |
|  | Sequence generation | 16a | Who generated the random allocation sequence and the method used | Page 18 |
|  | 16b | Type of randomisation and details of any restriction (eg, stratification, blocking and block size) | Page 18 |
|  |  |  |  | **Reported on page no.** |
|  | Implementation | 17 | Whether the personnel who enrolled and those who assigned participants to the interventions had access to the random allocation sequence | Page 15 |
|  | Blinding | 18a | Who was blinded after assignment to interventions (eg, participants, care providers, outcome assessors, data analysts) | Page 15 |
|  | 18b | If blinded, how blinding was achieved and description of the similarity of interventions | Page 15 |
|  | Statistical methods | 19a | Statistical methods used to compare groups for primary and secondary outcomes, including harms | Page 33,34,35,36 |
|  | 19b | Definition of who is included in each analysis (eg, all randomised participants), and in which group | Page 33,34 |
|  | 19c | Methods for any additional analyses (eg, subgroup and sensitivity analyses), distinguishing prespecified from post hoc | Page 39, 40,41 |
|  | **Results** | | |  |
|  | Participant flow, including flow diagram | 20a | For each group, the numbers of participants who were randomly assigned, received intended intervention, and were analysed for the primary outcome | Page 32 |
|  | 20b | For each group, losses and exclusions after randomisation, together with reasons | Page 32 |
|  | Recruitment | 21a | Dates defining the periods of recruitment and follow-up for outcomes of benefits and harms | Page 32 |
|  | 21b | If relevant, why the trial ended or was stopped | N/A |
|  | Intervention and comparator delivery | 22a | Intervention and comparator as they were actually administered (eg, where appropriate, who delivered the intervention/comparator, how participants adhered, whether they were delivered as intended (fidelity)) | Page 42/43 |
|  | 22b | Concomitant care received during the trial for each group | Page 19 |
|  | Baseline data | 23 | A table showing baseline demographic and clinical characteristics for each group |  |
|  | Numbers analysed,  outcomes and estimation | 24 | For each primary and secondary outcome, by group:  ● the number of participants included in the analysis  ● the number of participants with available data at the outcome time point  ● result for each group, and the estimated effect size and its precision (such as 95% confidence interval)  ● for binary outcomes, presentation of both absolute and relative effect size | Page 33 and 34 |
|  | Harms | 25 | All harms or unintended events in each group | N/A |
|  | Ancillary analyses | 25 | Any other analyses performed, including subgroup and sensitivity analyses, distinguishing pre-specified from post hoc | Page 39, 40, 41 |
|  | **Discussion** | | |  |
|  | Interpretation | 27 | Interpretation consistent with results, balancing benefits and harms, and considering other relevant evidence | Page 43/44 |
|  | Limitations | 38 | Trial limitations, addressing sources of potential bias, imprecision, generalisability, and, if relevant, multiplicity of analyses | Page 43/44 |

Citation: Hopewell S, Chan AW, Collins GS, Hróbjartsson A, Moher D, Schulz KF, et al. CONSORT 2025 Statement: updated guideline for reporting randomised trials. BMJ. 2025; 388:e081123. <https://dx.doi.org/10.1136/bmj-2024-081123>
© 2025 Hopewell et al. This is an Open Access article distributed under the terms of the Creative Commons Attribution License (<https://creativecommons.org/licenses/by/4.0/>), which permits unrestricted use, distribution, and reproduction in any medium, provided the original work is properly cited.

*We strongly recommend reading this statement in conjunction with the CONSORT 2025 Explanation and Elaboration and/or the CONSORT 2025 Expanded Checklist for important clarifications on all the items. We also recommend reading relevant CONSORT extensions. See [www.consort-spirit.org](http://www.consort-spirit.org).
